# Supplementary material for: Comparative analysis of cis-regulation following stroke and seizures in subspaces of conserved eigensystems
Source: PubMed Central journal article supplement (PMC2902439; doi:10.1186/1752-0509-4-86), 2010-06-17
Supplement: 1752-0509-4-86-S2.pdf [file 1752-0509-4-86-S2.pdf]

| Motif (Matrix Family) | A representative matrix and its logo                                                        | Representative transcription factor(s) | Relevant known role of the transcription factor(s)        |
|-----------------------|---------------------------------------------------------------------------------------------|----------------------------------------|-----------------------------------------------------------|
| AP1F                  | AP1.01     | AP1                                    | neuronal death                                            |
| SATB                  | SATB1.01   | Satb1                                  | attachment to nuclear matrix                              |
| EGRF                  | EGR1.01    | Egr1–3                                 | neuronal activity, neuronal plasticity                    |
| ZF5F                  | ZF5.01     | Zfp161                                 | represses FMR1 gene – neuronal plasticity                 |
| ZBPF                  | ZBP89.01   | Zbp89                                  | ---                                                       |
| CREB                  | CREB1.01   | Creb                                   | neuronal activity, neuronal plasticity                    |
| PARF                  | VBP.01     | DBP                                    | binding sites overlap CREB, epilepsy, neuronal plasticity |
| E4FF                  | E4F.01    | E4f1                                   | binding sites overlap CREB, cell cycle                    |
| LHXF                  | LHX1.01  | Lhx1–3                                 | motor neuron identity                                     |
| AHRR                  | AHR.01   | Arnt2                                  | response to hypoxia                                       |
| AP1R                  | NFE2.01  | Nfe2l1–2                               | oxidative stress                                          |

### Additional file 2 - Sequence logos and transcription factors binding to the motifs identified by BN analysis

For each identified motif (non-redundant motif – see Materials and methods), the name and the sequence logo of a representative nucleotide distribution matrix (Genomatix) are shown, followed by the name of a transcription factor (TF) binding to this motif and relevant known functions of this TF.
