# Supplementary material for: Comparative analysis of cis-regulation following stroke and seizures in subspaces of conserved eigensystems
Source: Springer Nature journal article supplement (doi:10.1186/1752-0509-4-86), 2010-06-17

**A** Mcao singular values 2-5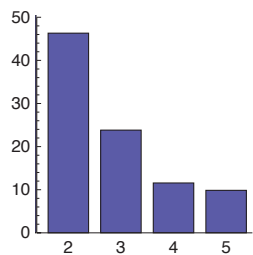**B** eigengene M2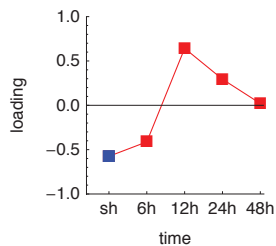**C** eigengene M3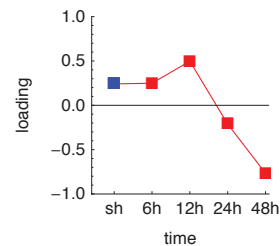**D** Kainate singular values 2-10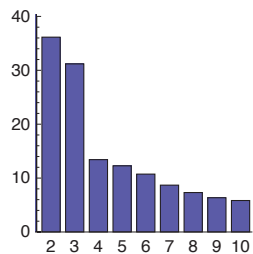**E** eigengene A2 (folded)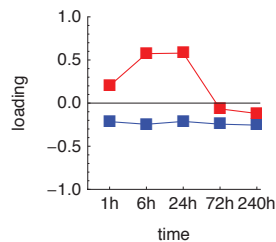**F** eigengene A3 (folded)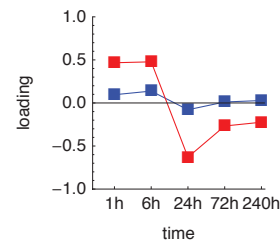**G** Correlations of eigenarrays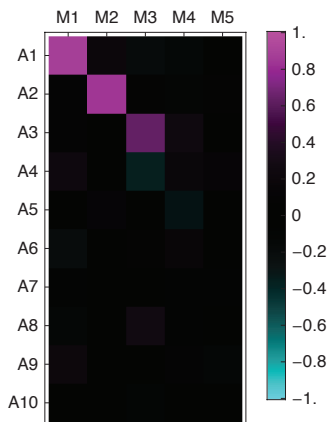**H** eigenarrays M2, A2 (values for the common genes)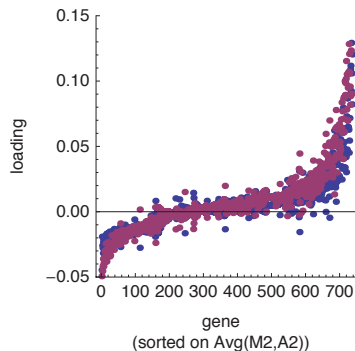**I** eigenarrays M3, A3 (values for the common genes)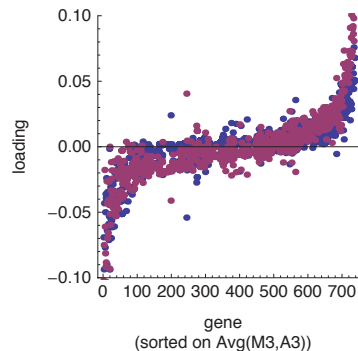

Supplement: 12918_2009_475_MOESM5_ESM.pdf [file 12918_2009_475_MOESM5_ESM.pdf]
