# Supplementary material for: Comparative analysis of cis-regulation following stroke and seizures in subspaces of conserved eigensystems
Source: Springer Nature journal article supplement (doi:10.1186/1752-0509-4-86), 2010-06-17

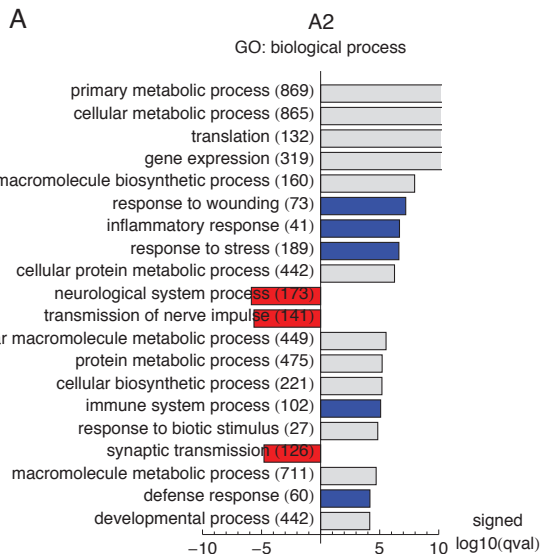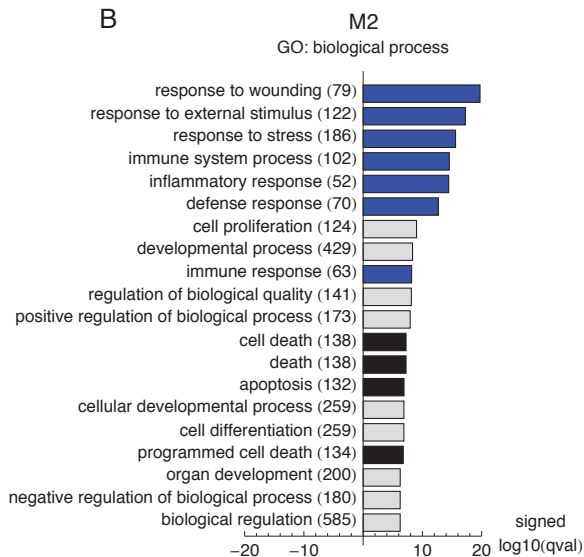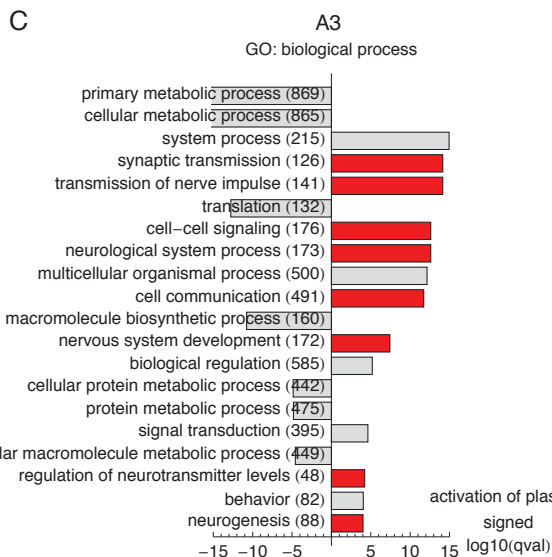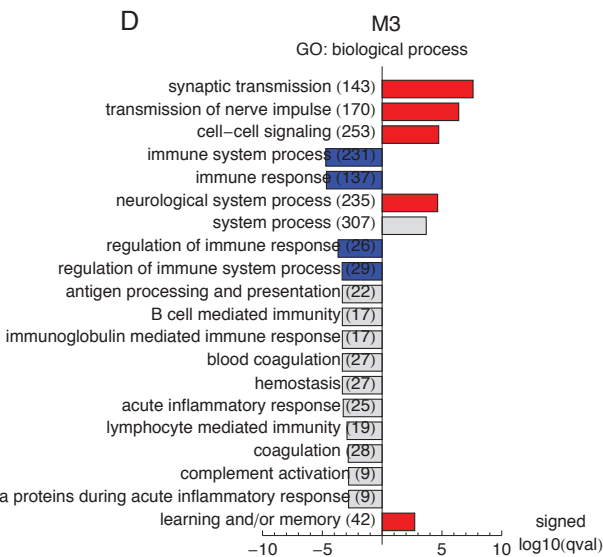

Supplement: 12918_2009_475_MOESM6_ESM.pdf [file 12918_2009_475_MOESM6_ESM.pdf]
