# Supplementary material for: Comparative analysis of cis-regulation following stroke and seizures in subspaces of conserved eigensystems
Source: Springer Nature journal article supplement (doi:10.1186/1752-0509-4-86), 2010-06-17
Supplement: 12918_2009_475_MOESM7_ESM.pdf [file 12918_2009_475_MOESM7_ESM.pdf]

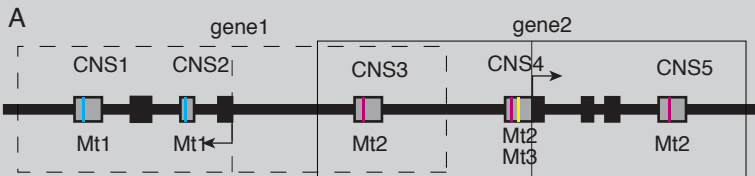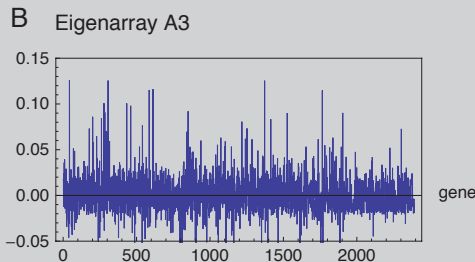

**C**

|       | Mt1   | Mt2     | Mt3 | ... |
|-------|-------|---------|-----|-----|
| gene1 | {1,2} | {3}     | {}  | ... |
| gene2 | {}    | {3,4,5} | {4} | ... |
| ...   | ...   | ...     | ... | ... |

|       | Mt1 | Mt2 | Mt3 | ... | Mt1_Mt2 | Mt1_Mt3 | ... | Mt2_Mt3 | ... |
|-------|-----|-----|-----|-----|---------|---------|-----|---------|-----|
| gene1 | 1   | 1   | 0   | ... | 0       | 0       | ... | 0       | ... |
| gene2 | 0   | 1   | 1   | ... | 0       | 0       | ... | 1       | ... |
| ...   | ... | ... | ... | ... | ...     | ...     | ... | ...     | ... |

**D**

|       | A1  | A2  | A3  | ... |
|-------|-----|-----|-----|-----|
| gene1 | +   | -   | +   | ... |
| gene2 | +   | +   | -   | -   |
| ...   | ... | ... | ... | ... |

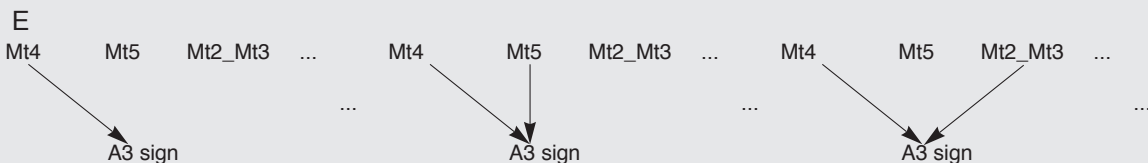

**F**

| BN score              | q-value | Set of Comp. Motifs |
|-----------------------|---------|---------------------|
| $4.3107 \times 10^8$  | <0.001  | Mt4 Mt5             |
| $4.17003 \times 10^8$ | <0.001  | Mt5 Mt61            |
| $1.5724 \times 10^8$  | <0.001  | Mt4_Mt61 Mt5        |
| ...                   | ...     | ...                 |

| motifs |     | A3 sign |      | number of genes |
|--------|-----|---------|------|-----------------|
| Mt4    | Mt5 | -       | +    |                 |
| 0      | 1   | 0.5     | 0.5  | 96              |
| 1      | 0   | 0.48    | 0.52 | 381             |
| 0      | 0   | 0.57    | 0.43 | 328             |
| 1      | 1   | 0.21    | 0.79 | 234             |
| All    |     | 0.45    | 0.55 | 1039            |
