# Supplementary material for: Comparative analysis of cis-regulation following stroke and seizures in subspaces of conserved eigensystems
Source: Springer Nature journal article supplement (doi:10.1186/1752-0509-4-86), 2010-06-17
Supplement: 12918_2009_475_MOESM8_ESM.pdf [file 12918_2009_475_MOESM8_ESM.pdf]

A A2→M2

| Training: Kainate         |         |                     | Test: MCAO |              |
|---------------------------|---------|---------------------|------------|--------------|
| BN score                  | q-value | Feature             | BN score   | q-value      |
| 0.254871                  | 0.011   | <b>AP1F</b>         | 0.824317   | <b>0.001</b> |
| 0.0000464739              | 1.      | AP1F HOXC           | 0.17675    | 0.006        |
| 0.0000259144              | 1.      | AP1F PIT1           | 0.218585   | 0.006        |
| 0.000014982               | 1.      | AP1F SATB           | 0.147317   | 0.009        |
| $1.31092 \times 10^{-7}$  | 1.      | AP1F HNF1_HOXC      | 2.10775    | <0.001       |
| $7.56606 \times 10^{-12}$ | 1.      | AP1F E4FF HNF1_HOXC | 0.0795164  | 0.021        |
| $2.85003 \times 10^{-12}$ | 1.      | AP1F HNF1_SNAP PIT1 | 0.104155   | 0.014        |

B M2→A2

| Training: MCAO |         |                     | Test: Kainate              |              |
|----------------|---------|---------------------|----------------------------|--------------|
| BN score       | q-value | module_set          | BN score                   | q-value      |
| 2.10775        | <0.001  | AP1F HNF1_HOXC      | $1.31092 \times 10^{-7}$   | 1.           |
| 0.824317       | 0.001   | <b>AP1F</b>         | 0.254871                   | <b>0.011</b> |
| 0.218585       | 0.006   | AP1F PIT1           | 0.0000259144               | 1.           |
| 0.17675        | 0.006   | AP1F HOXC           | 0.0000464739               | 1.           |
| 0.147317       | 0.009   | AP1F SATB           | 0.000014982                | 1.           |
| 0.104155       | 0.014   | AP1F HNF1_SNAP PIT1 | $2.85003 \times 10^{-12}$  | 1.           |
| 0.0795164      | 0.021   | AP1F E4FF HNF1_HOXC | $7.56606 \times 10^{-12}$  | 1.           |
| 0.0457055      | 0.042   | AP1F PIT1 RREB      | $<2.85003 \times 10^{-12}$ | 1.           |
| 0.0417503      | 0.049   | AP1F_AP1R           | $<2.85003 \times 10^{-12}$ | 1.           |
| 0.0410351      | 0.049   | SATB                | $<2.85003 \times 10^{-12}$ | 1.           |

C A3→M3

| Training: Kainate     |         |                  | Test: MCAO               |              |
|-----------------------|---------|------------------|--------------------------|--------------|
| BN score              | q-value | Feature          | BN score                 | q-value      |
| $4.31078 \times 10^8$ | <0.001  | <b>EGRF LHXF</b> | 0.229441                 | <b>0.009</b> |
| $4.17003 \times 10^8$ | <0.001  | <b>LHXF ZBPF</b> | 0.152447                 | <b>0.013</b> |
| $1.5724 \times 10^8$  | <0.001  | EGRF_ZBPF LHXF   | 0.00195931               | 0.732        |
| $1.25018 \times 10^8$ | <0.001  | <b>LHXF ZF5F</b> | 0.0788775                | <b>0.027</b> |
| $1.07687 \times 10^8$ | <0.001  | EGRF_ZF5F LHXF   | 0.000823212              | 0.985        |
| $9.51965 \times 10^7$ | <0.001  | EBOX LHXF        | 0.0130215                | 0.174        |
| $3.30419 \times 10^7$ | <0.001  | HOXF_OCT1 ZBPF   | 0.0000592705             | 1.           |
| $2.96533 \times 10^7$ | <0.001  | E2FF_EGRF LHXF   | $7.85364 \times 10^{-6}$ | 1.           |
| $2.64311 \times 10^7$ | <0.001  | <b>AHRR LHXF</b> | 0.294314                 | <b>0.007</b> |
| $2.38358 \times 10^7$ | <0.001  | AHRR CLOX        | 0.0062272                | 0.343        |

D M3→A3

| Training: MCAO |         |                  | Test: Kainate |              |
|----------------|---------|------------------|---------------|--------------|
| BN score       | q-value | Feature          | BN score      | q-value      |
| 5140.02        | <0.001  | <b>AP1R</b>      | 0.673304      | <b>0.003</b> |
| 165.356        | <0.001  | <b>AP1R PARF</b> | 432.564       | <0.001       |
| 161.999        | <0.001  | <b>PARF</b>      | 448.265       | <0.001       |
| 124.941        | <0.001  | <b>CREB</b>      | 22946.        | <0.001       |
| 88.2873        | <0.001  | AP1R MEF2        | 0.0305232     | 0.09         |
| 64.3365        | <0.001  | <b>AHRR AP1R</b> | 18.2066       | <0.001       |
| 55.6683        | <0.001  | <b>AP1R ZF5F</b> | 265.177       | <0.001       |
| 44.5959        | <0.001  | <b>AP1R EGRF</b> | 1.83339       | 0.001        |
| 37.2971        | <0.001  | <b>AHRR</b>      | 20839.1       | <0.001       |
| 33.5465        | <0.001  | <b>AP1R E4FF</b> | 0.12286       | <b>0.026</b> |

E Conditional probability table for {AP1F, SATB}

| motifs |      | sign of M2  |             | number of genes |
|--------|------|-------------|-------------|-----------------|
| SATB   | AP1F | -           | +           |                 |
| 0      | 1    | 0.38        | <b>0.62</b> | 287             |
| 1      | 0    | <b>0.68</b> | 0.32        | 123             |
| 0      | 0    | 0.55        | 0.45        | 753             |
| 1      | 1    | 0.57        | 0.43        | 105             |
| All    |      | 0.52        | 0.48        | 1268            |

F Conditional probability table for {EGRF, LHXF}

| motifs |      | sign of A3 |             | number of genes |
|--------|------|------------|-------------|-----------------|
| EGRF   | LHXF | -          | +           |                 |
| 0      | 1    | 0.5        | 0.5         | 96              |
| 1      | 0    | 0.48       | 0.52        | 381             |
| 0      | 0    | 0.57       | 0.43        | 328             |
| 1      | 1    | 0.21       | <b>0.79</b> | 234             |
| All    |      | 0.45       | 0.55        | 1039            |
