# Supplementary material for: Comparative analysis of cis-regulation following stroke and seizures in subspaces of conserved eigensystems
Source: Springer Nature journal article supplement (doi:10.1186/1752-0509-4-86), 2010-06-17

A

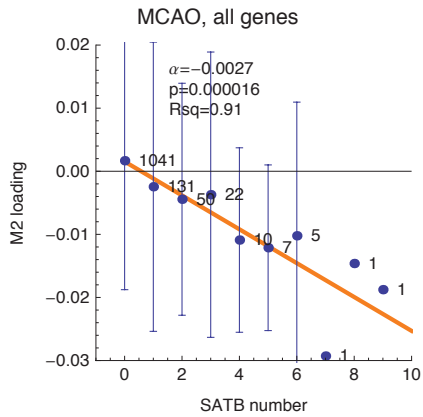

B

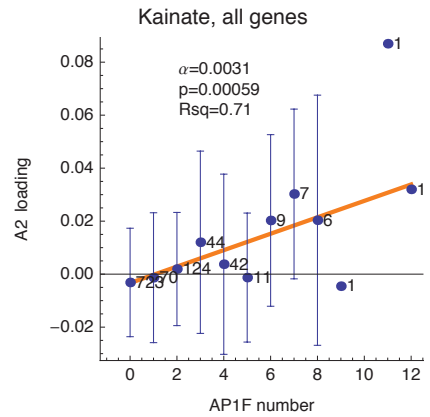

C

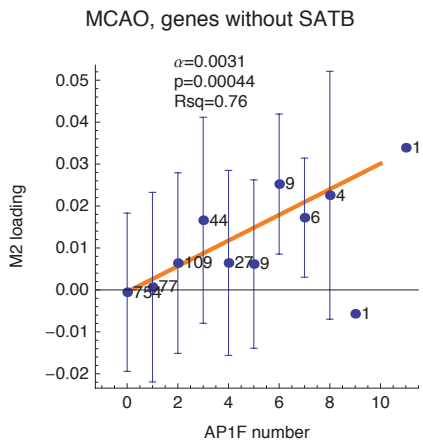

D

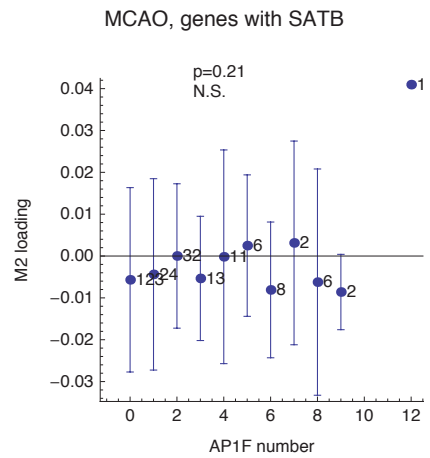

E MCAO, Timp1 profile

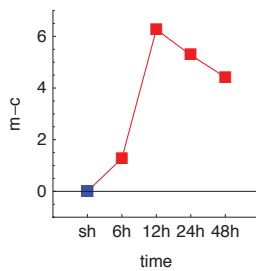

F Kainate, Timp1 profile

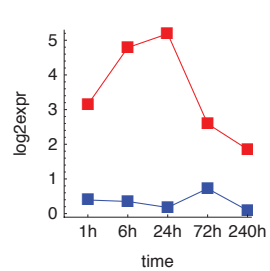

G Hypothetical mechanism

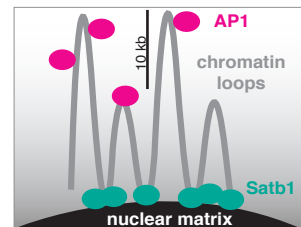

Supplement: 12918_2009_475_MOESM9_ESM.pdf [file 12918_2009_475_MOESM9_ESM.pdf]
